# Supplementary material for: Primary trabeculectomy for advanced glaucoma: pragmatic multicentre randomised controlled trial (TAGS)
Source: PubMed Central journal article supplement — BMJ. 2021 May 12;373:n1014. doi: 10.1136/bmj.n1014 (PMC8114777; doi:10.1136/bmj.n1014), 2021-05-12

**Supplementary Table A. Inclusion/Exclusion Criteria**

| Inclusion Criteria                                                                                                                                                                                                                                                                                                                                                                                                                                                                                                                                                                                                                                                                              | Exclusion Criteria                                                                                                                                                                                                                                                                                                                                                                                                                                                                                                                                                                                                                                                               |
|-------------------------------------------------------------------------------------------------------------------------------------------------------------------------------------------------------------------------------------------------------------------------------------------------------------------------------------------------------------------------------------------------------------------------------------------------------------------------------------------------------------------------------------------------------------------------------------------------------------------------------------------------------------------------------------------------|----------------------------------------------------------------------------------------------------------------------------------------------------------------------------------------------------------------------------------------------------------------------------------------------------------------------------------------------------------------------------------------------------------------------------------------------------------------------------------------------------------------------------------------------------------------------------------------------------------------------------------------------------------------------------------|
| <ul style="list-style-type: none"> <li>• had severe glaucomatous visual field loss (HPA classification) in one or both eyes at presentation</li> <li>• had OAG including pigment dispersion glaucoma, pseudoexfoliative glaucoma and normal tension glaucoma</li> <li>• were willing to participate in a trial</li> <li>• were able to provide informed consent</li> <li>• aged <math>\geq 18</math> years</li> <li>• agreed, if female and of childbearing potential, to ensure that they used effective contraception during the study and for three months thereafter. A negative urine pregnancy test for females of childbearing potential was required prior to randomisation.</li> </ul> | <ul style="list-style-type: none"> <li>• unable to undergo incisional surgery due to inability to lie flat or unsuitable for anaesthetic</li> <li>• had a high-risk of trabeculectomy failure such as previous conjunctival surgery, complicated cataract surgery</li> <li>• had secondary glaucomas, and primary angle-closure glaucoma</li> <li>• were pregnant, nursing, or planning a pregnancy or were females of childbearing potential not using a reliable method of contraception. A woman was considered to be of childbearing potential unless she was without a uterus or was post-menopausal and had been amenorrhic for at least 12 consecutive months.</li> </ul> |



Note: VFQ-25 – National Eye Institute Visual Function Questionnaire (25 items); HUI-3 – Health Utility Index; GUI – Glaucoma Utility Index; VFMD - Visual Field Mean Deviation; LogMAR – Logarithm of the mean angle of resolution.

<sup>1</sup> additional questionnaire undertaken immediately prior to trabeculectomy surgery

<sup>2</sup> Discrete Choice Experiment at 27 months

<sup>3</sup> Time and travel questionnaire sent after 30 months

†EQ-5D-5L, HUI-3 and GUI responses were used to estimate health state utility values for use in the economic evaluation (see Chapter 6).

**Supplementary Table C. Anti-glaucoma medication index eye**

|                                        | <b>Trabeculectomy N=227</b> | <b>Medical management<br/>N=226</b> |
|----------------------------------------|-----------------------------|-------------------------------------|
| <b>4 months</b>                        | <b>N=217</b>                | <b>N=220</b>                        |
| Number of Glaucoma Drops – mean (SD)   | 0.43 (0.79)                 | 1.77 (0.92)                         |
| Number of participants receiving drops | 61 (28.1)                   | 210 (95.5)                          |
| Glaucoma drop type                     |                             |                                     |
| Pg Analogue                            | 57 (26.3)                   | 205 (93.2)                          |
| β-blocker                              | 22 (10.1)                   | 91 (41.4)                           |
| CA Inhibitor                           | 13 (6.0)                    | 75 (34.1)                           |
| α- Agonist                             | 1 (0.5)                     | 18 (8.2)                            |
| Pilocarpine                            | 1 (0.5)                     | 0 (0)                               |
| Diamox                                 | 2 (0.9)                     | 1 (0.5)                             |
| <b>12 months</b>                       | <b>N=216</b>                | <b>N=211</b>                        |
| Number of Glaucoma Drops – mean (SD)   | 0.34 (0.79)                 | 1.78 (1.01)                         |
| Number of participants receiving drops | 41 (19.0)                   | 188 (89.1)                          |
| Glaucoma drop type                     |                             |                                     |
| Pg Analogue                            | 38 (17.6)                   | 182 (86.3)                          |
| β-blocker                              | 22 (10.2)                   | 98 (46.4)                           |
| CA Inhibitor                           | 14 (6.5)                    | 76 (36.0)                           |
| α- Agonist                             | 0 (0)                       | 19 (9.0)                            |
| Pilocarpine                            | 0 (0)                       | 1 (0.5)                             |
| Diamox                                 | 2 (0.9)                     | 0 (0)                               |
| <b>24 months</b>                       | <b>N=211</b>                | <b>N=208</b>                        |
| Number of Glaucoma Drops – mean (SD)   | 0.47 (0.92)                 | 1.64 (1.15)                         |
| Number of participants receiving drops | 53 (25.1)                   | 163 (78.4)                          |
| Glaucoma drop type                     |                             |                                     |
| Pg Analogue                            | 43 (20.4)                   | 154 (74.0)                          |
| β-blocker                              | 30 (14.2)                   | 91 (43.8)                           |
| CA Inhibitor                           | 22 (10.4)                   | 76 (36.5)                           |
| α- Agonist                             | 4 (1.9)                     | 18 (8.7)                            |
| Pilocarpine                            | 0 (0)                       | 2 (1.0)                             |
| Diamox                                 | 1 (0.5)                     | 1 (0.5)                             |

**Supplementary Figure A. Subgroups for Trabeculectomy versus Medical management.**

**(a) 4 months; (b) 12 months; (c) 24 months. 1st quintile – most deprived, 5th quintile - least deprived**

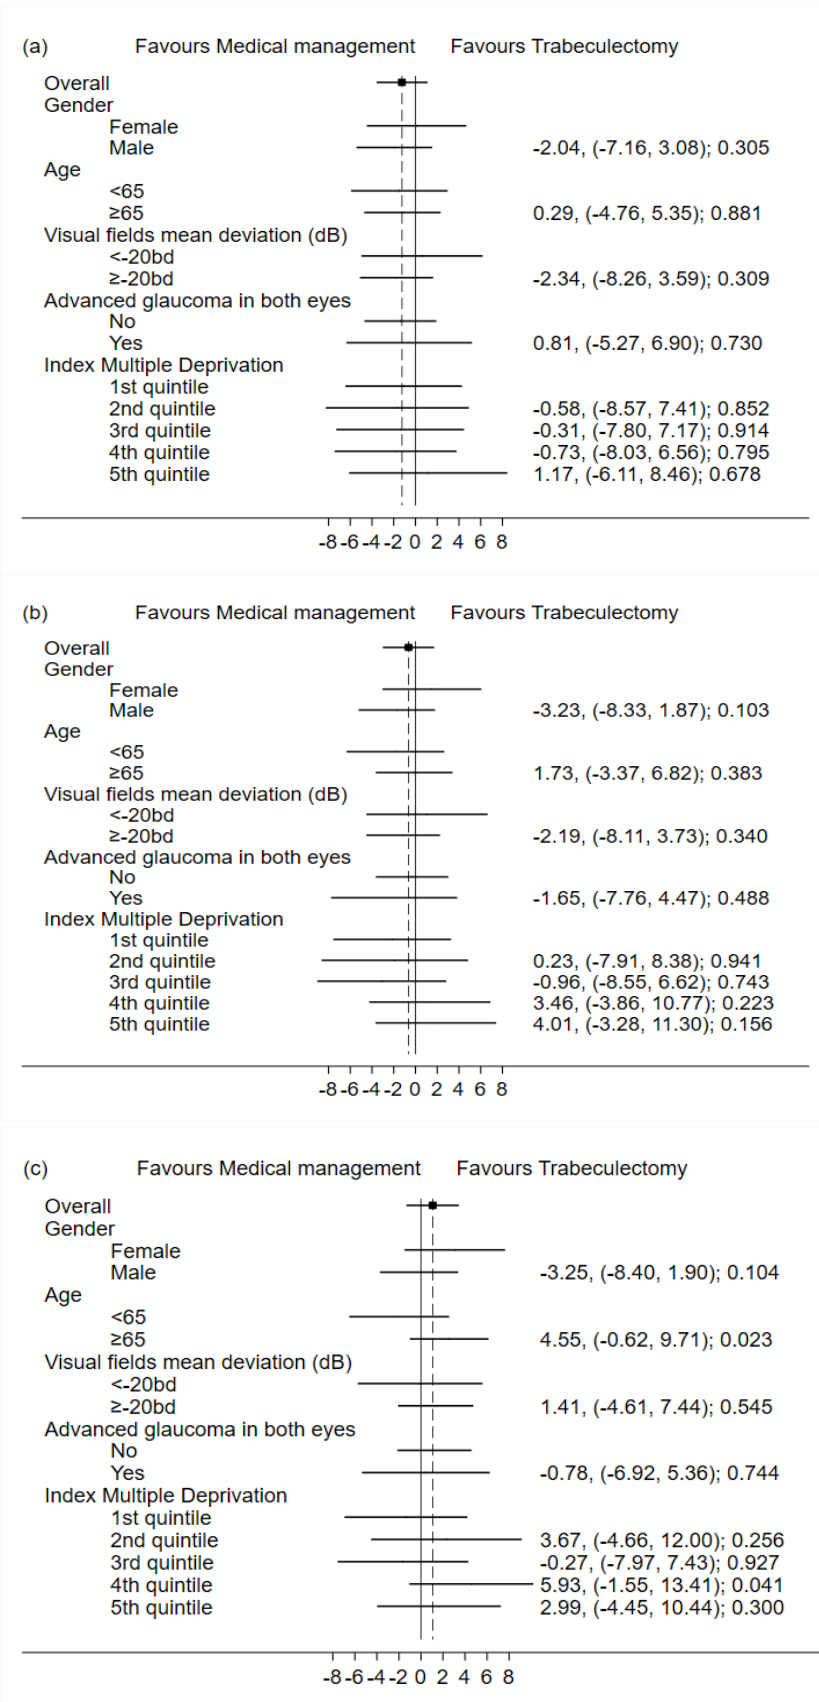

Supplement: kina063068.ww4.pdf [file kina063068.ww4.pdf]
