# Supplementary material for: Primary trabeculectomy for advanced glaucoma: pragmatic multicentre randomised controlled trial (TAGS)
Source: PubMed Central journal article supplement — BMJ. 2021 May 12;373:n1014. doi: 10.1136/bmj.n1014 (PMC8114777; doi:10.1136/bmj.n1014), 2021-05-12
Supplement: kina063068.ww2.pdf [file kina063068.ww2.pdf]

## Supplementary Appendix 2

### Study Oversight

#### *Trial Steering Committee:*

- *Independent chairperson and statistician: Professor John Thompson (Chair from 2015), Professor of Ophthalmic Epidemiology, Department of Health Sciences, University of Leicester, UK (retired 2019 but remains TSC Chair)*
- *Chief Investigator: Professor Anthony King, Honorary Professor Clinical Ophthalmology and Consultant Ophthalmologist, University of Nottingham and Queens Medical Centre, Nottingham, UK.*
- *Trial Manager: Dr Gordon Fernie, Centre for Healthcare Randomised Trials, Health Services Research Unit, University of Aberdeen, Aberdeen, UK (until Jan 2020).*
- *Independent clinician with relevant expertise: Mr Mark Batterbury, Consultant Ophthalmologist, St Paul's Eye Unit, Royal Liverpool and Broadgreen University Hospitals NHS Trust, Liverpool, UK.*
- *Independent clinician with relevant expertise: Mr Wojciech Karwatowski (from 2018), Consultant Ophthalmologist, Department of Ophthalmology, Leicester Royal Infirmary, Leicester, UK.*
- *Patient and public involvement representative: Mr Russell Young, former Chief Executive, International Glaucoma Association (retired JUL 2016 but remains a TSC member).*
- *Mr Faruque Ghanchi, Consultant Ophthalmologist, BRI Bradford Teaching Hospitals NHS Foundation Trust, Bradford, UK (Independent clinician with relevant expertise 2015 – 2019).*
- *Professor Bal Dhillon, Professor of Ophthalmology, Princess Alexandra Eye Pavilion, Edinburgh, UK (Independent clinician with relevant expertise in 2014).*
- *Professor Colm O'Brien, Professor of Ophthalmology, School Of Medicine and Medical Science, Mater Hospital, Dublin, Ireland (Independent chairperson in 2014).*

#### *Data Monitoring Committee:*

- *Independent chairperson and clinician: Professor James Morgan, Professor of Ophthalmology, School of Optometry and Vision Sciences, Cardiff University, Cardiff, UK.*
- *Independent statistician: Professor David Crabb, Professor of Statistics and Visual Research, City University London, London, UK*

- *Independent triallist: Ms Sue Tebbs, Deputy Director, Birmingham Clinical Trials Unit, University of Birmingham (retired 2019), formerly Head of Operations and Deputy Director, Clinical Trials Unit, University College London, London, UK .*
